# Supplementary material
Source: PubMed Central journal article supplement (PMC7744494)

**Supplementary Figure 1. Example counterimmuno-electrophoresis (CIEP) gel.** Precipitin lines of identity (arrow) in 3 patients form with the monospecific anti-Ro60 control. K562 antigen extract is used as a source of Ro60 antigen. A second band (\*) is seen in Patient 3 of different specificity (anti-La).

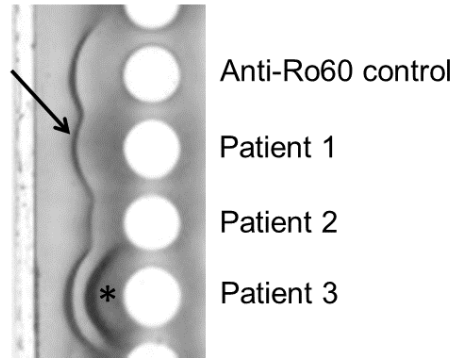

**Supplementary Figure 2. Workflow and division of samples in the 12-month study period.** *CIEP*, counterimmuno-electrophoresis, *LIB*, line immunoblot assay.

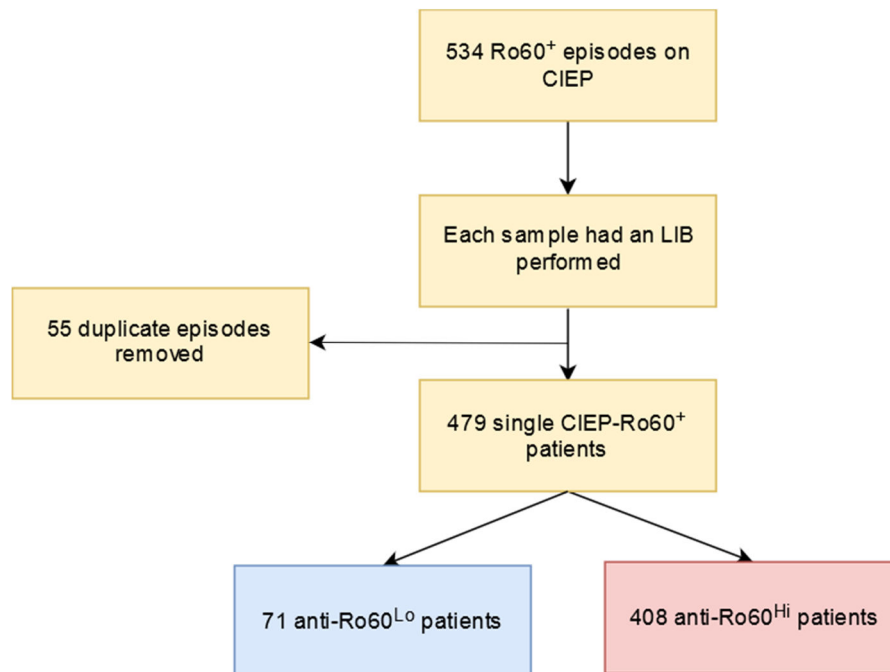

Supplement: CEI-203-13-s001.pdf [file CEI-203-13-s001.pdf]
